# Supplementary material for: Synthesis and crystal structure of rac-2-(1,3-dioxo­isoindolin-2-yl)ethyl 4-methyl-N-phenyl-N′-(tri­iso­propyl­sil­yl)benzene­sulfondiimidoate: the first member of a new substance class
Source: PubMed Central journal article supplement (PMC9260357; doi:10.1107/s2056989022005904), 2022-06-10
Supplement: e-78-00699-sup3.pdf [file e-78-00699-sup3.pdf]

## Supporting Information S1-S3

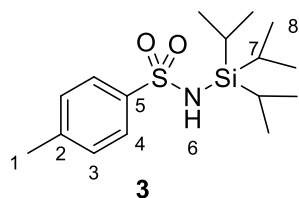

**S1:** molecular scheme of TIPS-protected sulfonamide **3** with atom numbering used in the NMR assignments.

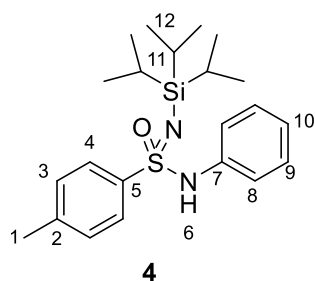

**S2:** molecular scheme of TIPS-protected sulfonimidamide **4** with atom numbering used in the NMR assignments.

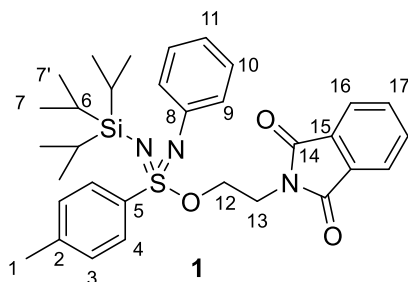

**S3:** molecular scheme of the title compound **1** with atom numbering used in the NMR assignments.
